# 1 Outsourced hearing in an orb-weaving spider that uses its 2 web as an auditory sensor

3 Jian Zhou<sup>a,d,1\*</sup>, Junpeng Lai<sup>a,1</sup>, Gil Menda<sup>b</sup>, Jay A. Stafstrom<sup>b</sup>, Carol I. Miles<sup>c</sup>, Ronald R. Hoy<sup>b\*</sup>, and  
4 Ronald N. Miles<sup>a\*</sup>

5 <sup>a</sup>Department of Mechanical Engineering, Binghamton University, Binghamton, NY 13902, USA

6 <sup>b</sup>Department of Neurobiology and Behavior, Cornell University, Ithaca, NY 14853, USA

7 <sup>c</sup>Department of Biological Sciences, Binghamton University, Binghamton, NY 13902, USA

8 <sup>d</sup>Center for Nanoscale Materials, Argonne National Laboratory, 9700 South Cass Avenue, Argonne,  
9 60439, Illinois, USA

10 <sup>1</sup>These authors contributed equally to this work.

11 \*Correspondence to R.N.M. (miles@binghamton.edu), R.R.H. (rrh3@cornell.edu), or J.Z.  
12 (zhouj@anl.gov).

13 **Keywords:** spider, hearing, spider web, extended cognition

## 14 Abstract

15 Hearing is a fundamental sense of many animals, including all mammals, birds, some reptiles,  
16 amphibians, fish, and arthropods. The auditory organs of these animals are extremely diverse in  
17 anatomy after hundreds of millions of years of evolution, yet all are made up of cellular tissues and are  
18 morphologically part of bodies of animals. Here we show hearing in the orb-weaving spider, *Larinioides*  
19 *sclopetarius* is not constrained by the organism's body but is extended through outsourcing hearing to  
20 its extended phenotype, the proteinaceous, self-manufactured orb-web. We find the wispy, wheel-  
21 shaped orb-web acts as a hyperacute acoustic "antenna" to capture the sound-induced air particle  
22 movements that approach the maximum physical efficiency, better than the acoustic responsivity of all  
23 previously known eardrums. By sensing the motion of web threads, the spider remotely detects and  
24 localizes the source of an incoming airborne acoustic wave such as those emitted by approaching prey  
25 or predators. By outsourcing its acoustic sensors to its web, the spider is released from body size  
26 constraints and permits the araneid spider to increase its sound-sensitive surface area enormously,  
27 up to 10,000 times greater than the spider itself. The spider also enables the flexibility to functionally  
28 adjust and regularly regenerate its "external eardrum" according to its needs. The "outsourcing" and  
29 "supersizing" of auditory function in spiders provides unique features for studying extended and  
30 regenerative sensing, and designing novel acoustic flow detectors for precise fluid dynamic  
31 measurement and manipulation.

## 32 Introduction

33 During the water-to-land transition, animals have gone through dramatic challenges in aerial hearing  
34 (1, 2). To effectively detect weak, distant airborne sound, terrestrial vertebrates and some  
35 invertebrates have evolved the tympanic eardrums which are very sensitive to the pressure component  
36 of sound (1, 3). Alternatively, some arthropods, especially those of miniscule size, have evolved  
37 pendulum-like, long wispy filaments to detect the velocity component of sound (4-6). While the auditory  
38 organs of different animals are extremely diverse in anatomy after hundreds of millions of years of  
39 evolution (7, 8), they are all organs of cellular origin and are morphologically part of bodies of animals.

40 Spiders are among the oldest land animals, with a fossil record dating back to the Devonian Period  
41 (around 380-million years ago) (9). All spiders produce silk, a biomaterial that can be stronger than  
42 steel in strength-to-weight ratio yet extremely flexible (10), owing to its exceptional material properties.  
43 When woven into a broad latticework, a web can serve as a net for capturing prey that fly or walk into  
44 it (11-13). We previously showed that a single strand of nano-dimensional spider silk can move with a

45 velocity very close to that of the surrounding air particle movements, with the maximum physical  
46 efficiency from infrasound to ultrasound, despite the low viscosity and low density of air (14). Here we  
47 show that the highly responsive aerodynamic property of silk fibers are woven and stretched into  
48 diaphanous orb-web can function as a huge acoustic “antenna,” which allows the spider to efficiently  
49 detect faint airborne sound from a distant source. This outsourced orb-web “eardrum” as an extended  
50 phenotype beyond the body operates on a very different principle from the much smaller auditory  
51 organs of all other animals.

52

## 53 **Results and Discussion**

54

55 We have found that the orb-weaving spiders detect and localize distant airborne sound (Fig. 1, Movie  
56 S1, Movie S2). Spiders used in this study are *Larinioides sclopetarius*, a familiar araneid related to the  
57 species celebrated by E.B. White, in “Charlotte’s Web”. All spiders were field-collected in Vestal, N.Y.  
58 and kept in laboratory conditions, where they spontaneously spin orb-webs within wooden frames (30  
59 cm × 30 cm × 1 cm). We videotaped spider behavioral reactions (N=60 spiders) to airborne acoustic  
60 tones within a spacious closed anechoic room with a 60 fps video camera, in 2 different auditory  
61 configurations (see *SI Appendix*, Fig. S1, Table S1): 1) normal-incident sound waves to the orb-web  
62 plane, emitted from a frontally-positioned loudspeaker, 3.0 m away to the spider; and 2) oblique-  
63 incident directional sound waves, emitted from loudspeakers placed at 45 degrees to the left and right  
64 of the spider in azimuth, 0.5 m away. Before making any measurements, we ensured that the spiders  
65 were undisturbed and resting naturally within the hub region. Each spider was acoustically stimulated  
66 only once per trial. The behavior of each spider was video-monitored for 5 seconds after initiating the  
67 stimulus tone. Its behavior in the 5 seconds preceding acoustic stimulation served as the silent control  
68 period (0 dB). Within our sealed chamber there were no uncontrolled airflows or substrate vibrations  
69 (see *Methods and SI Appendix*, Fig. S2) to disturb the spider; the airborne stimuli from the speakers  
70 were the only source of web vibrations.

71 The responsiveness and sensitivity of spiders to relatively distant (3.0 m) normal-incident acoustic  
72 waves are shown in Fig. 1A-D. Four distinct behavioral responses, in the form of rapid adaptations in  
73 body posture, were provoked by acoustic stimulation under 4 combinations of tone frequency (200 Hz  
74 and 1000 Hz) and sound pressure level (SPL, a “soft” 68 dB and an “intense” 88 dB). We assigned 48  
75 spiders to 4 groups (N=12 spiders in each group). The duration of each tone stimulus, at a given SPL  
76 and frequency, was 3 seconds. Of 12 individuals tested in each group, 6/12 and 11/12 responded to  
77 the 200 Hz tones at 68 dB and 88 dB respectively, 3 /12 and 9/12 responded to the 1000 Hz tones to  
78 68 dB and 88 dB sound levels, respectively, but none responded during silent controls. We identified  
79 several categories of intensity-dependent behaviors to 200 Hz tones. At high 88 dB levels (Fig. 1B, *SI*  
80 *Appendix*, Movie S1), body responses consisted of 1) *crouching* (pulling the web strands slightly with  
81 legs), 2) *stretching-out* or *flattening of the body* (rapidly extending all 8 legs outward from the  
82 cephalothorax), 3) *foreleg displaying* (lifting the forelegs into the air), and 4) *turning* (abruptly changing  
83 the direction of the body). The response to the 88 dB stimuli was complex and variable—some spiders  
84 responded sequentially with several behaviors, so we only recorded the spider’s initial response for  
85 labeling the behavior. Importantly, the only behavioral response to the low intensity stimulation, at 68  
86 dB was *crouching* (Fig. 1C). Orb-weaving spiders were previously shown to be able to detect the  
87 nearby (3-4 cm) flies buzzing in the air (15), which is a near-field effect but not hearing at distances  
88 that would qualify as far-field hearing at the 3 m distances demonstrated in our present study. The  
89 sound pressure level of the biologically relevant information depends on the source distance to the  
90 spiders. According to the inverse square law, the sound pressure level drops by 20 dB for every 10  
91 times increase in source distance, for example an 88 dB sound source at 1 m distance would be 68  
92 dB at 10 m distance. Potential predators and prey such as birds, frogs, and crickets can produce loud  
93 sound at remote distance. The sound pressure level can be even larger than 80 dB after propagating  
94 in air for 10 m (*SI Appendix*, Table S2). Given a hearing threshold lower than 68 dB, orb-weaving  
95 spiders should be able to early detect predators and prey at a distance more than 10 m away.

96 We also observed that spiders can localize the direction of airborne sound accurately. Active and  
97 rapid turning movements toward the source speaker were observed when the speaker location was  
98 shifted from normal to oblique incident ( $45^\circ$ , L/R) in azimuth (Fig. 1E, F, *SI Appendix*, Movie S2). Unlike  
99 normal-incident soundwaves that arrive at the orb-web plane simultaneously, oblique-incident  
100 soundwaves arrive with brief delays, creating directional acoustic cues such as time, amplitude and  
101 phase differences at different locations of the orb-web (16). Of 12 individuals tested for directional  
102 hearing, all (12/12, Fig. 1E) responded to oblique-incident 200 Hz tones at 88 dB, similar to the high  
103 responsivity (11/12, Fig. 1B) to the normal-incident sound at 88 dB from the front. However, more  
104 spiders (5/12, Fig. 1E, F) responded to the directional oblique-incident sound by turning towards the  
105 stimulating speaker, compared to only 1 of 12 spiders (Fig. 1B) that turned in response to normal-  
106 incident sound.

107 Having found that *L. sclopetarius* spiders exhibit behavioral responses by detecting and localizing  
108 airborne sound, we then investigated the physical properties of the web as an acoustic antenna by  
109 measuring the mechanical response of the web to direct acoustic stimulation using sounds that are  
110 salient to spider hearing (Fig. 2, Movie S3). Using Doppler vibrometry, we measured sound-induced  
111 out-of-plane web motion for the web alone and with live spiders resting in the web's hub. The web was  
112 separated from a loudspeaker 3.0 m away and aligned so that the direction of sound propagation was  
113 perpendicular to the plane of the orb-web, creating a normal-incident planar sound wave (*SI Appendix*,  
114 Fig. S1E, F). We broadcast sinusoidal test tones ranging from 100 Hz to 10,000 Hz. The air particle  
115 velocity component,  $u(t)$ , of a sound wave was computed from the measurement of the pressure  $p(t)$   
116 using a calibrated pressure-sensitive microphone near, but not touching the web, where  $u(t)=p(t)/\rho_0c$ ,  
117  $\rho_0$  is the density of air,  $c$  is the speed of sound in air (17). Fig. 2A shows an example of the measured  
118 orb-web response to 200 Hz acoustic signals, in which the orb-web follows the air particle motion with  
119 almost full fidelity and maximum physical efficiency (i.e.  $V_{web}/V_{air}\sim 1$ ), better than the acoustic  
120 responsivity of all known eardrums (14, 18). Similarly, at other measurement frequencies, orb-webs  
121 responded effectively to airborne acoustic signals, a bandwidth encompassing the sounds produced  
122 by potential prey and predators, such as insects and birds (Fig. 2C, E, *SI Appendix*, Fig. S3 and S4,  
123 and Audio S1). The differences in velocity between the spider body and the web (Fig. 2D, E) suggest  
124 that mechanical strain is actively induced on the spider's legs when stimulated by airborne sound. In  
125 spiders, vibrational signals such as faint acoustic stimuli are presumably detected by the strain-  
126 sensitive lyriform organs located in spider legs (19-21).

127 It is important to note that some spider species and insects can detect air particle velocity with  
128 pendulum-like, long, wispy cuticular hair receptors (4-6, 18). It is also widely known that spiders can  
129 sense movements of the web when a vibrating stimulus is applied directly (touching) to the web silk  
130 (12, 13, 22). To determine whether the orb-weaving spider *L. sclopetarius* is detecting highly  
131 circumscribed sound-induced web movements or is directly detecting some fluctuating acoustic  
132 quantity of the air (such as pressure or velocity) through some unidentified mechanosensor, we  
133 stimulated only small, focal regions of the web while ensuring that any airborne acoustic signal would  
134 have such a low amplitude that it would not be detectable by the spider, perched in the center of the  
135 web, distant from such a focal acoustic stimulus.

136 To accomplish this, we used a miniature speaker (dimensions 15 mm  $\times$  11 mm  $\times$  3 mm) as a focal  
137 sound source (Fig. 3A). The speaker was positioned 50 mm in radial distance away from the spider,  
138 that was resting in the web's hub. By aligning the small speaker as near as possible to the web without  
139 actually touching it, we created a localized "near-field" sound causing oscillations in air particle velocity,  
140 from the mini-speaker, but which rapidly decayed with distance as it propagates through the air (Fig.  
141 3B, C). We showed that the near-field airborne stimulation generated by the mini-speaker attenuated  
142 quickly with distance, and fell well below the spider's detection threshold after it spread to distantly  
143 perched spider ( $<50$  dB, see Fig. 3B, C and *SI Appendix*, Fig. S5). However, the out-of-plane web  
144 movements induced by the airborne sound created by the mini-speaker attenuated less, so that  
145 vibrational signals were transmitted to the spider. Results show that the spiders perceived minute  
146 localized web vibrations at extremely low intensity levels (Fig. 3D, E). Of 12 individuals, 4 responded

147 to 200 Hz web vibration tones of 3 s duration with equivalent SPL  $\leq 68$  dB ( $V_{rms} \leq 0.12$  mm/s). Spiders  
148 responded to these minute web vibrations by *crouching*, just as they respond to airborne stimuli at 68  
149 dB from a loudspeaker 3 m away (Fig. 1C, D). The behavioral response of spiders to minute web  
150 vibrations induced by the focal airborne sound confirms their abilities to perceive airborne acoustic  
151 signals solely by detecting web movements. In earlier work, Uetz et al. hypothesized and tested that  
152 nearby (up to 20 cm) acoustic stimulation might be an “early warning” channel against predators (23).  
153 The web-enabled hearing with threshold lower than 68 dB should allow the spider to early detect and  
154 localize predators and prey at a distance more than 10 m away (SI Appendix, Table S2).

155 Outsourcing the acoustic sensors to its web provides the spider with the flexibility to adjust its  
156 hearing adaptively according to its needs. When an orb-web is torn or badly damaged that disrupts its  
157 radial symmetry, an orb-weaver can recover its hearing through the orb-web antenna by weaving a  
158 new one within an hour. By adjusting web geometries and pre-tensions during the web weaving, the  
159 level and tuning of the mechanical responsiveness of the web threads can be both adjusted (See SI  
160 Appendix, Supplementary Information Text, and Fig. S6). For example, a variably-tensioned orb-web  
161 could efficiently filter out the bio-irrelevant low frequency noises which are unavoidable in the natural  
162 environment, such as the wind perturbation which has tremendous velocity and pressure amplitude  
163 than that of biorelevant acoustic signals. In principle, the multi-pedal spider can adaptively tune its  
164 hearing in real-time by behaviorally manipulating its extended “virtual eardrum”. Each of its 8 legs is  
165 endowed with sensitive vibration receptors that can be extended in all directions from the center of the  
166 web, representing “well-connected” nodes in the wheel-shaped network, consisting of smaller local  
167 nodes to interface with the web dynamics. On the one hand, the 8 legs are points of sampling for  
168 sensing, and on the other hand they have the potential to serve as feedforward controllers by adjusting  
169 postures and positions that may change directionality and sensitivity actively (24, 25). The size and  
170 shape of an orb web can be varied to meet the needs of a spider’s sensory and feeding ecology and  
171 demonstrates a remarkable level of flexibility in this surprising bioacoustic control system.

172 Biologists and material scientists are still discovering new properties of spider silk that can be  
173 repurposed as a biomaterial and deployed for practical human applications. Here, we demonstrate  
174 how a spider web made of nanoscale protein fibers serves as a megascale acoustic airflow sensor,  
175 contrasted sharply with all auditory organs made up cellular tissue, and necessarily subjected to body  
176 limitations. Taking advantage of the extended phenotype, the sensory surface area is up-scaled  
177 extensively, up to 10,000 times greater than the spider itself (26), much as a radio-telescope senses  
178 electromagnetic signals from cosmic sources. The acoustic function of the orb-web is analogous to an  
179 eardrum in other animals, but it senses the velocity of air particles, not its collective pressure. Spider  
180 webs are marvels of bio-architecture that greatly extend the spider’s capacity to sense and capture  
181 prey much larger than the spider itself (27, 28). The spiders also have the flexibility to tune and  
182 regenerate their hearing by manipulating the orb-webs. The new sensory modality of hearing could  
183 provide unique features for studying extended and regenerative sensing, where the orb-web functions  
184 as an integral part of the cognitive systems of a spider (28-30). The novel hearing mechanism could  
185 also presage a new generation of acoustic fluid-flow detectors in the domain of nanoscale biosensors  
186 for applications requiring precise fluid dynamic measurement and manipulation (31-33).

187

## 188 **Methods**

189

190 **Spiders and their orb-webs.** Orb-weaving spiders, *Larinioides sclopetarius*, were collected from  
191 natural habitats in Vestal, N.Y., and kept in laboratory conditions (approx. 22°C temperature, a 12 h:  
192 12 h light-dark cycle), where they spontaneously spin orb-webs within wooden frames (30 cm × 30 cm  
193 × 1 cm) in transparent enclosures with fruit flies (*Drosophila*). After weaving the orb-webs, spiders  
194 positioned themselves to settle within the hub region of the orb-webs, as in nature. A red dim light was  
195 always turned on to enable basic visualization for setting up experiments during all light-dark cycles.  
196 Female spiders were used in all experiments. The ranges of body length and weight of spiders are 5-  
197 8 mm and 0.7-1.9 mN, respectively.

198 **Experimental setups.** Three kinds of speaker configurations were used to create different airborne  
199 sound waves around the orb-web: 1) remote normal-incident sound wave propagating in the direction  
200 perpendicular to the plane of the web was generated by a subwoofer (Coustic HT612) and a tweeter  
201 (ESS Heil AMT1) with the crossover set at 2 kHz, placed 3.0 m away to the plane of the orb-web as  
202 shown in *SI Appendix*, Fig. S1A; 2) oblique-incident sound was created by two identical loudspeakers  
203 (NSM Model 5), placed 0.50 m away, 45° in azimuth on the left and right side of the spider, as shown  
204 in *SI Appendix*, Fig. S1B; 3) focal sound was generated by a miniature speaker (CUI CMS-15118D-  
205 L100, dimensions 15 mm × 11 mm × 3 mm), placed close to the web without touching (about 2 mm  
206 distance to the orb-web plane), 50 mm in radial distance from the spider resting in its hub web as  
207 shown in Fig. 3A.

208 The sound pressure  $p(t)$  around the orb-web was measured by a calibrated microphone (B&K 4138)  
209 placed close to the orb-web without touching. The out-of-plane motion of the orb-web was measured  
210 by a laser Doppler vibrometer (Polytec OFV-534). To measure different locations, the laser Doppler  
211 vibrometer was mounted on a precise 2-dimensional linear stage (Newport ILS250PP), controlled by  
212 a motion controller (Newport model ESP 301). The built-in camera within the vibrometer enabled the  
213 visualization of the measurement position on the orb-web. Base vibration was measured with a tri-  
214 axial accelerometer (PCB 356A11). A data acquisition system (NI PXI-1033) was used to acquire data.  
215 Spider behavioral responses were recorded using a video camera of 60 fps.

216 **Testing of spider behavioral response to airborne sound.** The spiders' behavioral reactions to  
217 airborne, tonal stimuli were videotaped under 3 acoustic conditions: 1) normal-incident sound waves  
218 (N=48 spiders), 2) oblique-incident directional sound waves (N=12 spiders), and 3) small focused  
219 beams of sounds (N=12 spiders). We used a single presentation of sound stimulus with duration of 3  
220 s for the normal-incident and focused sound experiments. For the oblique-incident directional sound  
221 experiment, we used 4 successive presentations of very short sound stimulus. Individual spider was  
222 randomly subjected to one of the patterns of directional stimuli, either L+R+L+R or R+L+R+L, where  
223 L or R represents the stimulus from left or right direction with 0.3 s duration, the symbols (+) represent  
224 silent gaps between the adjacent stimulus, which are 0.2 s, 1 s, and 0.2 s respectively. Spider  
225 behavioral reactions to the successive oblique-incident sound stimuli are provided in Table S3.  
226 Detailed experimental configurations are listed in Table S1. In all three kinds of behavioral  
227 experiments, each spider was acoustically stimulated only once per trial." Before making any  
228 measurements, we ensured that spiders were undisturbed and resting in the hub of their orb-webs. To  
229 guarantee this, after gently placing it in the testing area, the spider was left alone in the anechoic  
230 chamber for 0.5 h before playing tonal stimulation. At 88 dB stimulation, we noted that the spider's  
231 body posture sometimes resulted in a very slight rotation, so we labeled such behavior as a *turn* only  
232 when a spider's turn angle was unambiguously greater than 10 degrees. The response latency of an  
233 individual spider was counted from the recorded video frame number starting from the beginning of  
234 the stimuli. For all initial *turning* reactions to the oblique-incident sound, percentage of turning towards  
235 the randomly assigned direction of a sound source was given in Fig. 1F.

236 **Characterization of the normal-incident sound field.** By placing speakers far away (3.0 m) from the  
237 spider web in our anechoic chamber (*SI Appendix*, Fig. S1A), we approximately created a normal-  
238 incident planar acoustic field. The direction of the propagation of the sound waves was roughly  
239 perpendicular to the plane of the orb-web. *SI Appendix*, Fig. S1E shows an example of the measured  
240 sound pressure level (SPL) at 200 Hz around the spider orb-web in an area of 240 mm × 240 mm with  
241 scanned gap distance 10 mm, which is considerably uniform with a SPL variation within 1 dB at  
242 different locations. The broadband SPL at all measured locations is shown in *SI Appendix*, Fig. S1F,  
243 which has a variation within 2 dB under the measured frequency. The sound field around the spider  
244 web can be regarded as a plane wave approximately, considering the little variation of SPL. For a  
245 plane sound wave, the air particle velocity  $u(t)$  nearby the orb-web can be determined by measuring  
246 the sound pressure  $p(t)$  according to  $u(t)=p(t)/\rho_0 c$ , where  $\rho_0$  is the density of air,  $c$  is the speed of sound  
247 in air. The sound pressure level (SPL) was calculated by  $\text{SPL}=20\log_{10}(P_{\text{RMS}}/P_{\text{ref}})$ , where  $P_{\text{RMS}}$  is the  
248 root mean square of the measured sound pressure  $p(t)$ ,  $P_{\text{ref}}=20 \mu\text{Pa}$  is the reference pressure.

249 **Measurement of the airborne acoustic responsivity of the orb-webs.** We characterized the  
250 airborne acoustic responsivity of the orb-webs under well-controlled normal-incident plane-wave  
251 sound field (*SI Appendix*, Fig. S1A). To precisely characterize the frequency responses, we used a  
252 short period of pure tones at various frequencies from 100 Hz to 10000 Hz. The measured data was  
253 then processed at each frequency with Least Squares Data Fitting to estimate the amplitude and phase  
254 of the measured airborne acoustic waves from microphone and the motion of the web threads  
255 measured by the laser vibrometer. To measure the velocity responses of a spider and its peripheral  
256 orb-web, it is crucial to keep the spider stable during the measurement process. To avoid the motion  
257 interruption from the behavioral responses, we stimulated a spider with acoustic tones (200 Hz, 88 dB,  
258 3 s duration) before frequency measurement. After several cycles of acoustic stimulus, a spider rarely  
259 responded to the stimuli and kept stable so the measurement could be completed.

260 **Mapping the orb-web motion induced by airborne sound.** We mapped the out-of-plane motion of  
261 the orb-web at different locations with and without the spider resting in hub web respectively, and then  
262 recreated the motion based on the measured velocity response of web threads at different locations  
263 under a certain measurement frequency  $f$ . Since the air particle velocity can be approximately regarded  
264 to be uniform in the normal-incident plane-wave sound field, the air particle velocity around all  
265 measured web threads can be expressed as  $u(t) = Ue^{i\varphi}e^{i\omega t}$ , where  $\omega = 2\pi f$ ,  $U$  and  $\varphi$  are the velocity  
266 amplitude and phase of air particle motion. The time response of a measured web point in response  
267 to a steady-state airborne sound can be expressed as  $v_n(t) = V_n e^{i\varphi_n} e^{i\omega t}$ , where  $V_n$  and  $\varphi_n$  are the  
268 velocity amplitude and phase of the measured web point motion. As the measured frequency  
269 responses of web threads at different locations contain the velocity amplitude as well as phase, these  
270 results can be used to create the steady-state motion of the measured objects. Figures and Movies  
271 (Fig. 1A, Fig. 1D, and Movie S3) demonstrating the out-of-plane motion of the spider and its orb-web  
272 were created by STAR 7, a commercial modal analysis software.

273 **Characterization of the focal sound field.** We characterized the airborne signals as well as the out-  
274 of-plane transverse motion of web strands induced by the miniature speaker. Both sound pressure  
275 level (SPL, Fig. 3B) and sound velocity level (SVL, Fig. 3C) of the sound field were characterized. We  
276 scanned the acoustic pressure field by a probe microphone. The acoustic velocity field was  
277 characterized by an easily made velocity probe, constituted by the laser Doppler vibrometer and a  
278 strand of spider silk (14). The spider silk has a sub-micron diameter, 5 mm length, and was supported  
279 at its two ends loosely. By focusing the laser beam perpendicular to the longitudinal direction of the  
280 spider silk at its middle position, we measured the silk motion induced by the motion of the air particles.  
281 Before scanning of the velocity field in the orb-web plane, we confirmed that the silk velocity probe  
282 representing the air particle motion closely (i.e.  $V_{\text{silk}}/V_{\text{air}} \sim 1$ ) in the measured frequency, as shown by  
283 the insert figure in *SI Appendix*, Fig. S5A. Since velocity is a vector, we scanned the acoustic particle  
284 velocity in 3 dimensions, including  $V_x$ ,  $V_y$  and  $V_z$ . The overall amplitude of velocity  $V$  (Fig. 3C) at a  
285 position was evaluated by  $V = (V_x^2 + V_y^2 + V_z^2)^{-1/2}$ . To compare between the air particle velocity and  
286 sound pressure, the sound velocity level (SVL) was calculated by  $\text{SVL} = 20 \log_{10}(V_{\text{RMS}}/V_{\text{ref}})$ , where  $V_{\text{RMS}}$   
287 is the root mean square of the measured particle velocity  $V$ ,  $V_{\text{ref}} = P_{\text{ref}}/\rho_0 c$  is the reference velocity.

288 Before propagating to the location of spider, the nearfield airborne signals fell well below the  
289 detection threshold of the spiders (4, 20). The SPL (Fig. 3B) was below 30 dB, while the SVL (Fig. 3C)  
290 was lower than 50 dB ( $V_{\text{rms}} < 0.016$  mm/s) after reaching to the spider. The ultralow airborne signal is  
291 even lower than the detection threshold of the jumping spider (4), which enables the best-known spider  
292 sensitivity ( $\sim 65$  dB) so far. Meanwhile, we never observed any behavioral response of spiders to 50  
293 dB normal-incident airborne stimuli.

294 The out-of-plane transverse motion of web strands induced by the mini-speaker attenuated slower  
295 than the near-field airborne signals, so as to transmit the local vibrational signals to the spider (Fig. 3C  
296 and *SI Appendix*, Fig. S5D). Since the initial SVL generated by the mini-speaker 50 mm away from  
297 the spider is about 88 dB, and it attenuates about 20 dB after 40 mm, the equivalent SPL of the  
298 vibrational signals transmitted to the spider is less than 68 dB.

299 **Author Contributions:** Conceptualization: J.Z, R.R.H, R.N.M; Methodology: J.Z, J.L, G.M, J.A.S,  
300 C.I.M, R.R.H, R.N.M; Investigation: J.Z, J.L, G.M, J.A.S; Formal Analysis: J.Z, J.L, G.M, J.A.S, C.I.M,  
301 R.R.H, R.N.M; Resources: C.I.M, R.R.H, R.N.M; Funding acquisition: R.N.M; Writing – original draft:  
302 J.Z, R.R.H; Writing – review & editing: J.Z, J.L, G.M, J.A.S, C.I.M, R.R.H, R.N.M; Supervision:  
303 R.R.H, R.N.M.

#### 304 **Acknowledgments**

305 We thank Charles Walcott for his expert consultation and advice. This work was supported in part by  
306 the National Institute on Deafness and Other Communication Disorders of the National Institutes of  
307 Health under Award Number R01DC017720 (to R.N.M).

308

#### 309 **References**

- 310 1. W. A. van Bergeijk, Evolution of the sense of hearing in vertebrates. *Am. Zool.* **6**, 371–377  
311 (1966).
- 312 2. C. B. Christensen, J. Christensen-Dalsgaard, P. T. Madsen, Hearing of the African lungfish  
313 (*Protopterus annectens*) suggests underwater pressure detection and rudimentary aerial  
314 hearing in early tetrapods. *J. Exp. Biol.* **218**, 381–387 (2015).
- 315 3. D. Robert, J. Amoroso, R. R. Hoy, The evolutionary convergence of hearing in a parasitoid fly  
316 and its cricket host. *Science* **258**, 1135–1137 (1992).
- 317 4. P. S. Shamble, et al., Airborne acoustic perception by a jumping spider. *Curr. Biol.* **26**, 2913–  
318 2920 (2016).
- 319 5. G. Menda, et al., The long and short of hearing in the mosquito *Aedes aegypti*. *Curr. Biol.* **29**,  
320 709-714.e4 (2019).
- 321 6. C. J. Taylor, J. E. Yack, Hearing in caterpillars of the monarch butterfly (*Danaus plexippus*). *J.*  
322 *Exp. Biol.* **222** (2019).
- 323 7. R. R. Fay, L. A. Wilber, Hearing in vertebrates: a psychophysics databook, (Hill-Fay  
324 Associates, 1989).
- 325 8. J. T. Albert, A. S. Kozlov, Comparative aspects of hearing in vertebrates and insects with  
326 antennal ears. *Curr. Biol.* **26**, R1050–R1061 (2016).
- 327 9. W. A. Shear, J. M. Palmer, J. A. Coddington, P. M. Bonamo, A devonian spinneret: early  
328 evidence of spiders and silk use. *Science* **246**, 479–481 (1989).
- 329 10. F. G. Omenetto, D. L. Kaplan, New opportunities for an ancient material. *Science* **329**, 528–  
330 531 (2010).
- 331 11. L. H. Lin, D. T. Edmonds, F. Vollrath, Structural engineering of an orb-spider's web. *Nature*  
332 **373**, 146–148 (1995).
- 333 12. W. M. Masters, H. Markl, Vibration signal transmission in spider orb webs. *Science* **213**, 363–  
334 365 (1981).
- 335 13. C. V. Boys, The influence of a tuning-fork on the garden spider. *Nature* **23**, 149–150 (1880).
- 336 14. J. Zhou, R. N. Miles, Sensing fluctuating airflow with spider silk. *Proc. Natl. Acad. Sci.* **114**,  
337 12120–12125 (2017).
- 338 15. D. Klärner, and F. G. Barth, Vibratory signals and prey capture in orb-weaving spiders (*Zygiella*  
339 *x-notata*, *Nephila clavipes*; Araneidae). *J. Comp. Physiol.* **148**: 445-455 (1982).
- 340 16. M. A. Landolfi, F. G. Barth, Vibrations in the orb web of the spider *Nephila clavipes*: cues for  
341 discrimination and orientation. *J. Comp. Physiol. A* **179**, 493–508 (1996).

- 342 17. R. N. Miles, "One Dimensional Sound Fields" in Physical Approach to Engineering Acoustics,  
343 R. N. Miles, Ed. (Springer International Publishing, 2020), pp. 35–52.
- 344 18. P. Fratzl, F. G. Barth, Biomaterial systems for mechanosensing and actuation. *Nature* **462**,  
345 442–448 (2009).
- 346 19. J. A. Stafstrom, G. Menda, E. I. Nitzany, E. A. Hebets, R. R. Hoy, Ogre-faced, net-casting  
347 spiders use auditory cues to detect airborne prey. *Curr. Biol.* **30**, 5033-5039.e3 (2020).
- 348 20. C. Walcott, W. G. van der Kloot, The physiology of the spider vibration receptor. *J. Exp. Zool.*  
349 **141**, 191–244 (1959).
- 350 21. F. G. Barth, Geethabali, Spider vibration receptors: Threshold curves of individual slits in the  
351 metatarsal lyriform organ. *J. Comp. Physiol.* **148**, 175–185 (1982).
- 352 22. B. Mortimer, A. Soler, C. R. Siviour, R. Zaera, F. Vollrath, Tuning the instrument: sonic  
353 properties in the spider's web. *J. R. Soc. Interface* **13**, 20160341 (2016).
- 354 23. G. W. Uetz, J.A.Y. Boyle, C. S. Hieber, and R. S. Wilcox, Antipredator benefits of group living  
355 in colonial web-building spiders: the 'early warning' effect. *Anim. Behav.* **63**: 445-452 (2002).
- 356 24. T. Watanabe, Web tuning of an orb-web spider, *Octonoba sybotides*, regulates prey-catching  
357 behaviour. *Proc. R. Soc. Lond. B* **267**, 565–569 (2000).
- 358 25. K. Nakata, Attention focusing in a sit-and-wait forager: a spider controls its prey-detection  
359 ability in different web sectors by adjusting thread tension. *Proc. R. Soc. B* **277**, 29–33 (2010).
- 360 26. M. Gregorič, I. Agnarsson, T. A. Blackledge, M. Kuntner, Darwin's bark spider: giant prey in  
361 giant orb webs (*Caerostris darwini*, Araneae: Araneidae)? *J. Arachnol.* **39**, 287–295 (2011).
- 362 27. M. Nyffeler, R. Altig, Spiders as frog-eaters: a global perspective. *J. Arachnol.* **48**, 26–42  
363 (2020).
- 364 28. H. F. Japyassú, K. N. Laland, Extended spider cognition. *Anim. Cogn.* **20**, 375–395 (2017).
- 365 29. L. E. Miller, et al., Sensing with tools extends somatosensory processing beyond the body.  
366 *Nature* **561**, 239–242 (2018).
- 367 30. L. R. Hochberg, et al., Neuronal ensemble control of prosthetic devices by a human with  
368 tetraplegia. *Nature* **442**, 164–171 (2006).
- 369 31. T. Nakata, et al., Aerodynamic imaging by mosquitoes inspires a surface detector for  
370 autonomous flying vehicles. *Science* **368**, 634–637 (2020).
- 371 32. E. K. Sackmann, A. L. Fulton, D. J. Beebe, The present and future role of microfluidics in  
372 biomedical research. *Nature* **507**, 181–189 (2014).
- 373 33. M. Raissi, A. Yazdani, G. E. Karniadakis, Hidden fluid mechanics: Learning velocity and  
374 pressure fields from flow visualizations. *Science* **367**, 1026–1030 (2020).
- 375 34. Sound clips: Catalog no. ML 125254, ML 208175 and ML 516988, Macaulay Library at the  
376 Cornell Laboratory of Ornithology, Ithaca, NY.



377 **Figures**  
378

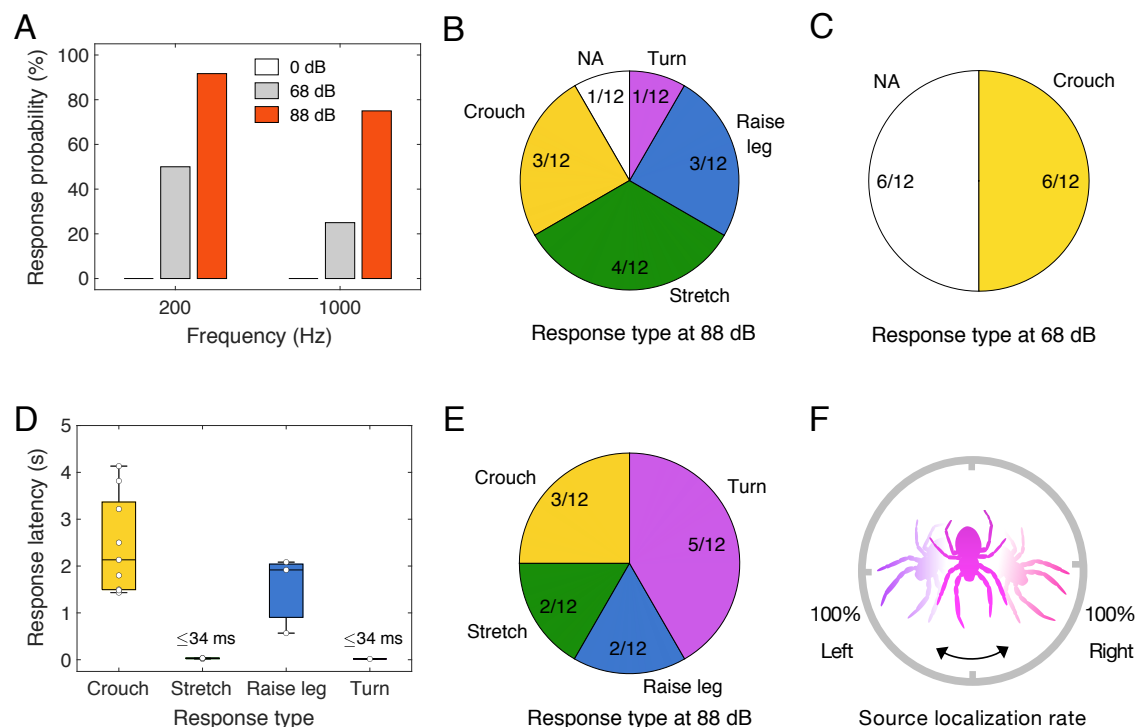

379 **Fig. 1.** Adaptive behavioral responses made by orb-weaving spiders stimulated by remote airborne  
380 sound. Two acoustic hearing conditions of airborne tone stimulation were investigated (*SI Appendix*,  
381 Fig. S1): 1) normal-incident sound (*A-D*, see Movie S1), generated by a loudspeaker, 3.0 m distance  
382 to the spider, with a propagated direction perpendicular to the plane of the orb-web; 2) oblique-incident  
383 sound (*E* and *F*, see Movie S2), from one of two identical loudspeakers, 0.50 m distance, randomly  
384 placed to the left and right side of the spider, 45° in azimuth. (*A*) Percentage of spider response (4  
385 groups, N=12 spiders in each group) to normal-incident acoustic tones of 3 s duration. (*B-D*) Behavioral  
386 response categories and response latencies (each value, median, interquartile, and range) to 200 Hz  
387 tones. NA represents no behavioral response in the pie charts. (*E*) Response (N=12 spiders) to  
388 oblique-incident acoustic tones (200 Hz, 88 dB). (*F*) Of all turning responses, percentage of turning  
389 towards the randomly assigned direction of a sound source.  
390

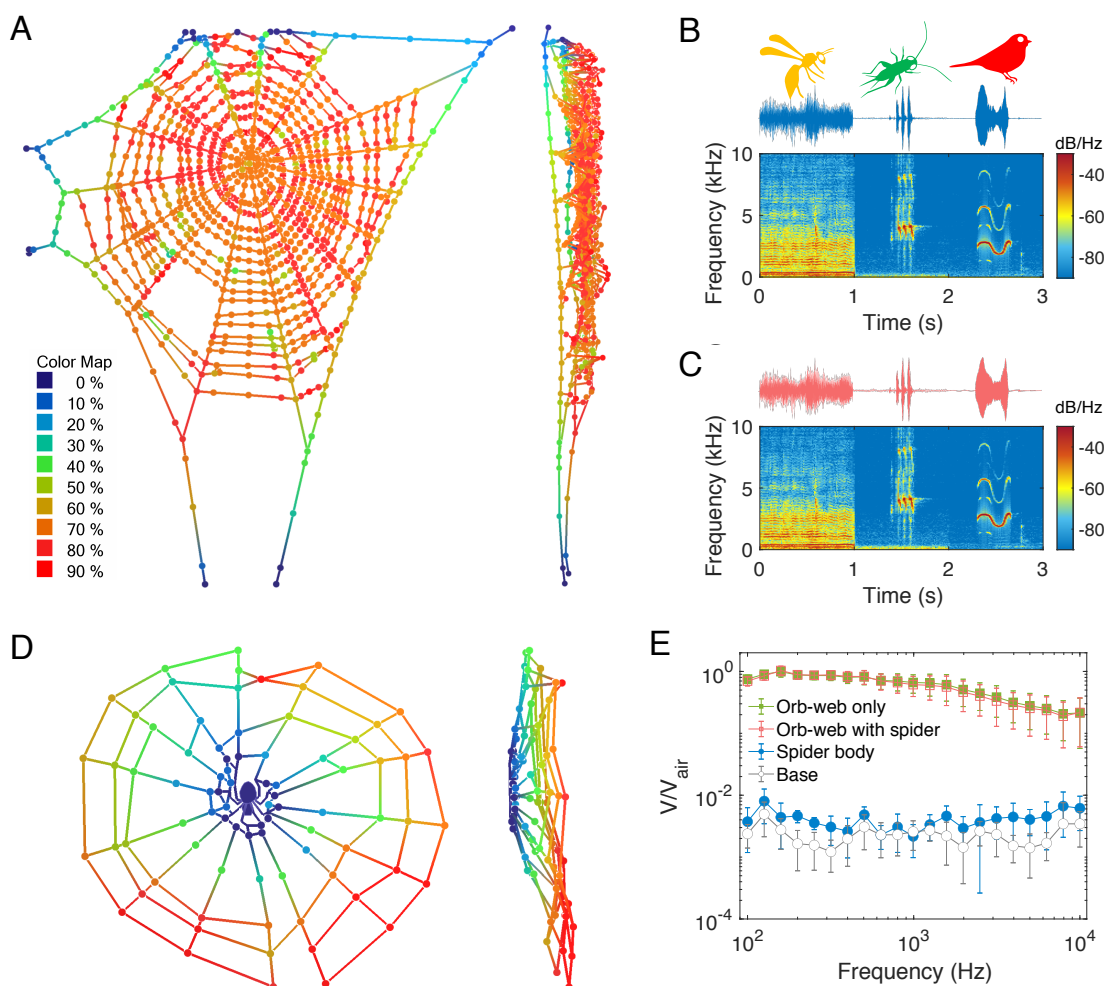

391

392 **Fig. 2.** Spider orb-web is an enormous, reconfigurable, regenerative, and highly sensitivity acoustic  
 393 antenna. (A-E) Orb-web responses to remote normal-incident sound, generated by a loudspeaker, 3.0  
 394 m distance to the spider. (A) Out-of-plane motion of a complete orb-web induced by a 200 Hz steady-  
 395 state sound field (see Movie S3). The colored heat map represents the amplitude ratio of the web  
 396 thread velocity  $V$  to the air particle velocity  $V_{\text{air}}$ , e.g. 90% represents  $V/V_{\text{air}}=0.9\sim 1.0$ . (B and C) Time-  
 397 domain traces and spectrograms of the airborne acoustic signal (34) measured by a pressure  
 398 microphone (B), and the signal-induced web motion measured by a laser vibrometer (C) at the hub  
 399 web position as shown in (A). The audio clip of the measured web motion is provided as Audio S1.  
 400 The acoustic signal spans a wide range of frequencies (100 Hz-10000 Hz) including hymenopteran  
 401 wing-beats, cricket chirpings, and bird songs. (D) Heat map depiction of out-of-plane motion of web  
 402 containing a live spider, induced by a 200 Hz sound field (Movie S3). Color coding of (D) same as (A).  
 403 (E) Statistic frequency responses of the spider orb-webs ( $N=12$ ) to airborne sound. Individual  
 404 measurement (1 of 12) contains 1 location on a spider body, 1 location on an orb-web frame base,  
 405 and 4 locations (up, down, left, and right) on radial threads of an orb-web in radial distance of 5 cm  
 406 away from its hub, without and with the spiders resting in the hub webs. Error bars show one standard  
 407 deviation (SD).

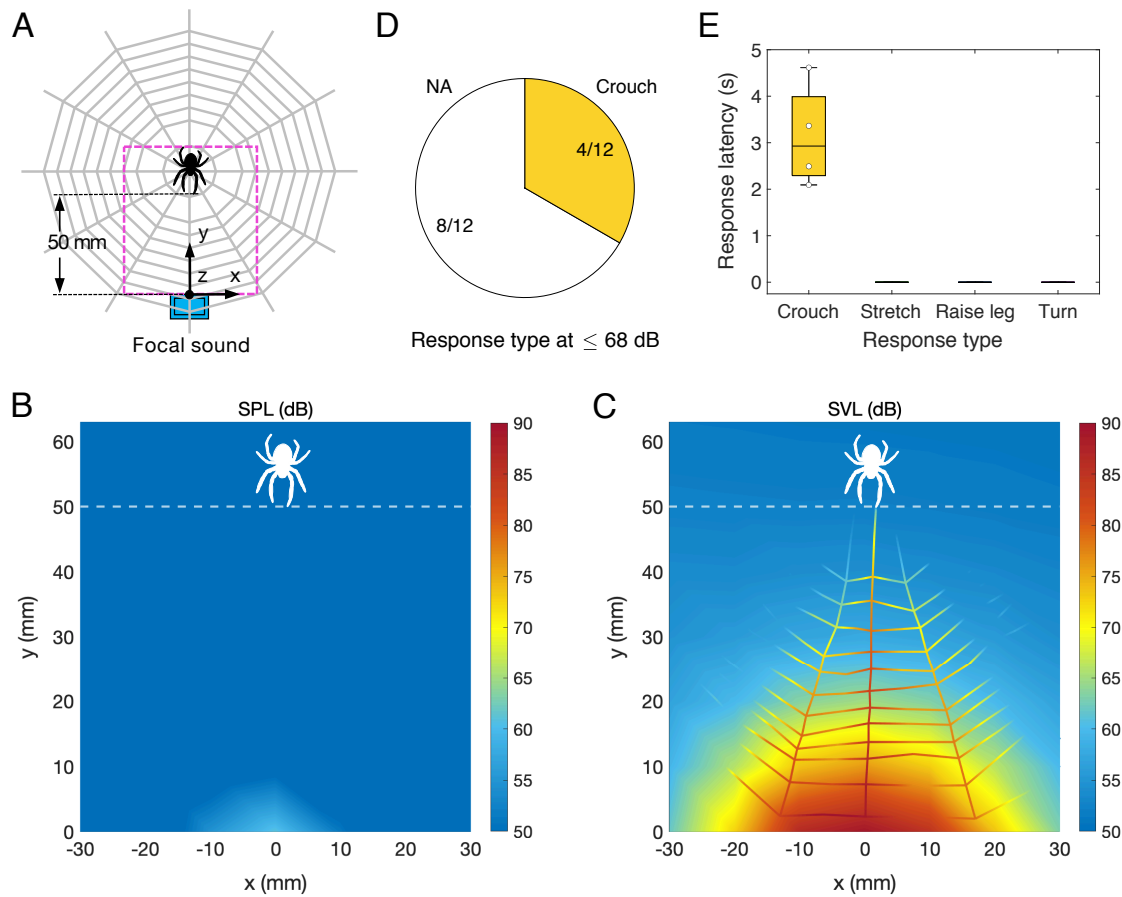

408

409 **Fig. 3.** Spider behavioral responses to orb-web movements stimulated by focal airborne sound. (A)  
 410 Schematic diagram of setup. Highly localized near-field sound was generated by a miniature speaker,  
 411 placed as close to the orb-web without touching it, 50 mm distance in radial distance from a spider  
 412 resting in its hub web. (B and C) Focal airborne sound field at 200 Hz, measured in the orb-web plane  
 413 as marked by the magenta rectangular region in (A). The near-field sound is velocity dominant, where  
 414 the sound pressure level (SPL in B) is almost ignorable in compared with the sound velocity level (SVL  
 415 in C). Minispeaker airborne acoustic signals attenuate quickly and fell well below the detection  
 416 threshold of spiders (see Methods) after propagating to where the spider sat ( $< 50$  dB), while the  
 417 induced out-of-plane web movements (C) attenuate less ( $\leq 68$  dB). (D and E) Behavioral response  
 418 categories and response latencies (each value, median, interquartile and range) to focal tones (200  
 419 Hz, equivalent SPL  $\leq 68$  dB, 3 s duration).
